# Supplementary material for: Citrus peel extracts attenuated obesity and modulated gut microbiota in mice with high-fat diet-induced obesity
Source: Royal Society of Chemistry journal article supplement (doi:10.1039/c7fo02066j), 2018-01-01
Supplement: c7fo02066j1.pdf [file c7fo02066j1.pdf]

Supplementary information

Supplementary Table 1. Chemical composition of PMF samples

| Peak No. | Common name             | Chemical names                               | 20% PMFs    | 24% PMFs    | 30% PMFs    | 65% PMFs    |
|----------|-------------------------|----------------------------------------------|-------------|-------------|-------------|-------------|
| 1        | 5-PMF                   | 5,7,3',4',5'-penta-hydroxyflavone            | N.D.        | N.D.        | N.D.        | N.D.        |
| 2        |                         | 3-hydroxy-5,6,7,8,3',4'-hexa-methoxyflavone  | N.D.        | N.D.        | N.D.        | N.D.        |
| 3        | 4-PMF                   | 5,7,3',4'-tetra-methoxyflavone               | 0.7 ± 0.1   | 0.5 ± 0.0   | 0.9 ± 0.0   | 1.6 ± 0.1   |
| 4        | Sinensetin              | 5,6,7,3',4'-penta-methoxyflavone             | 25.2 ± 0.0  | 20.8 ± 0.0  | 28.7 ± 0.0  | 79.7 ± 0.0  |
| 5        | Cirsimaritin            | 5,4'-dihydroxy-6,7-dimethoxyflavone          | 0.8 ± 0.0   | 0.7 ± 0.0   | 0.9 ± 0.0   | 3.7 ± 1.3   |
| 6        |                         | 3,5,6,7,3',4'-hexa-methoxyflavone            | 13.4 ± 0.0  | 15.8 ± 0.0  | 19.5 ± 0.0  | 48.3 ± 0.0  |
| 7        | Nobiletin               | 5,6,7,8,3',4'-hexamethoxyflavone             | 80.4 ± 0.1  | 98.2 ± 0.0  | 101.0 ± 0.0 | 128.0 ± 0.0 |
| 8        |                         | 5,6,7,4'-tetra-methoxyflavone                | 34.1 ± 0.1  | 36.8 ± 0.1  | 40.8 ± 0.1  | 90.7 ± 0.1  |
| 9        |                         | 5,4'-dihydroxy-6,7,8,3'-tetra-methoxyflavone | N.D.        | N.D.        | N.D.        | N.D.        |
| 10       | 6-Demethoxycirsimaritin | 5,4'-dihydroxy-7-methoxyflavone              | N.D.        | N.D.        | N.D.        | N.D.        |
| 11       |                         | 3,5,6,7,8,3',4'-hepa-methoxyflavone          | 63.9 ± 0.4  | 107.1 ± 0.2 | 104.8 ± 0.4 | 122.9 ± 3.9 |
| 12       | 5'-methoxynobiletin     | 5,6,7,8,3',4',5'-heptamethoxyflavone         | N.D.        | N.D.        | N.D.        | N.D.        |
| 13       | 5-Demethylsinensetin    | 5-hydroxy-6,7,3',4'-tetra-methoxyflavone     | 13.0 ± 0.8  | 9.2 ± 0.3   | 11.0 ± 0.1  | 47.4 ± 2.5  |
| 14       | Tangeretin              | 5,6,7,8,4'-penta-methoxyflavone              | 84.4 ± 0.1  | 167.3 ± 1.6 | 126.4 ± 0.0 | 238.1 ± 2.1 |
| 15       |                         | 5-hydroxy-3,6,7,3',4'-penta-methoxyflavone   | 0.8 ± 0.0   | 1.7 ± 0.7   | 2.3 ± 2.2   | 5.0 ± 0.5   |
| 16       | 5-Demethylnobiletin     | 5-demethyl-6,7,8,3',4'-hexamethoxyflavone    | 10.7 ± 0.0  | 16.3 ± 0.1  | 15.2 ± 0.2  | 40.8 ± 1.0  |
| 17       |                         | 5-hydroxy-6,7,4'-tri-methoxyflavone          | 2.8 ± 0.0   | 3.1 ± 0.1   | 3.0 ± 0.0   | 9.3 ± 0.1   |
| 18       |                         | 5-hydroxy-3,6,7,8,3',4'-hexamethoxyflavone   | 2.1 ± 0.0   | 5.3 ± 0.1   | 3.6 ± 0.1   | 8.6 ± 0.0   |
| 19       | 5-Demethyltangeretin    | 5-hydroxy-6,7,8,4'-tetra-methoxyflavone      | N.D.        | N.D.        | N.D.        | N.D.        |
|          |                         | PMFs                                         | 302.9 ± 0.1 | 447.9 ± 1.0 | 423.0 ± 0.3 | 714.6 ± 2.3 |
|          |                         | HPMFs                                        | 29.4 ± 0.8  | 35.6 ± 1.4  | 35.1 ± 2.6  | 111.0 ± 3.1 |
|          |                         | Total flavones                               | 332.4 ± 0.7 | 482.8 ± 3.3 | 457.9 ± 3.1 | 824.0 ± 7.8 |

The values were averages from duplicate samples and were given in mg/g, mean±SE.  
N.D.: not detected

Supplementary Figure 1. HPLC profile of standards

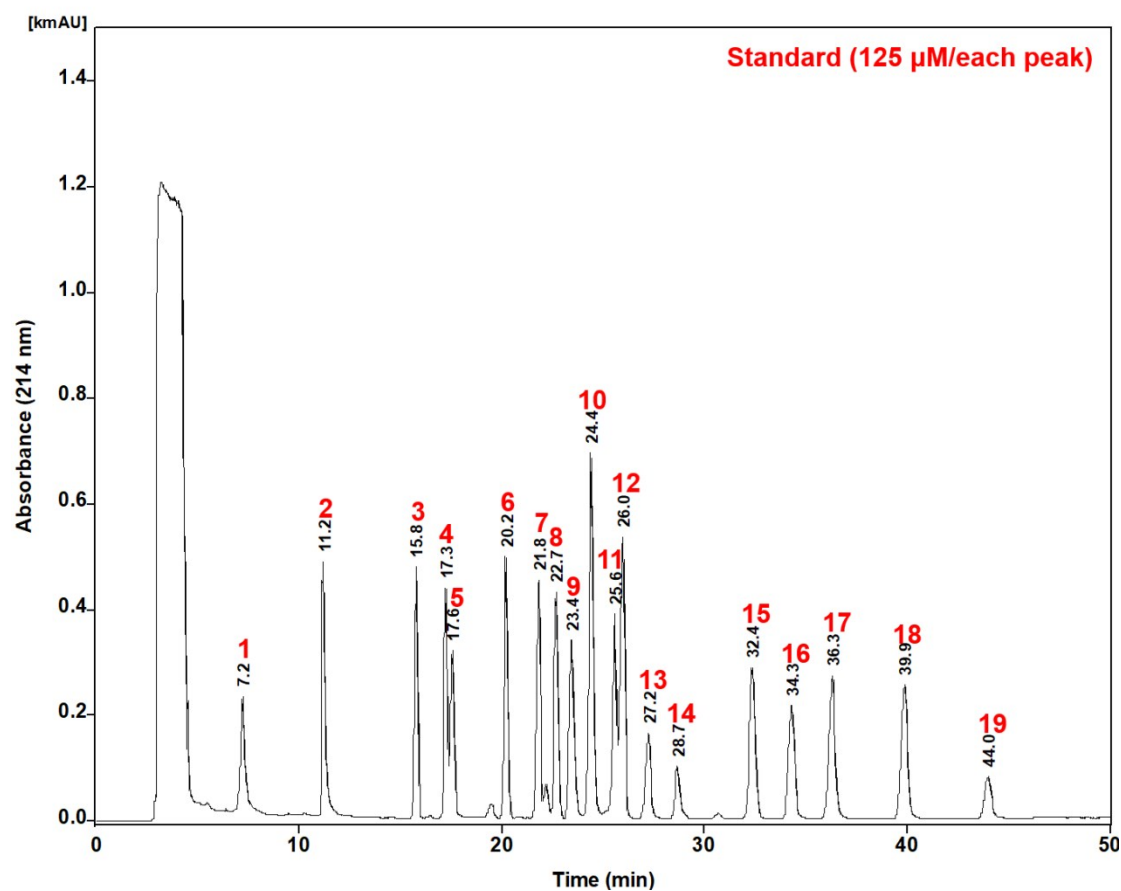

Supplementary Figure 2. HPLC profile of PMF A

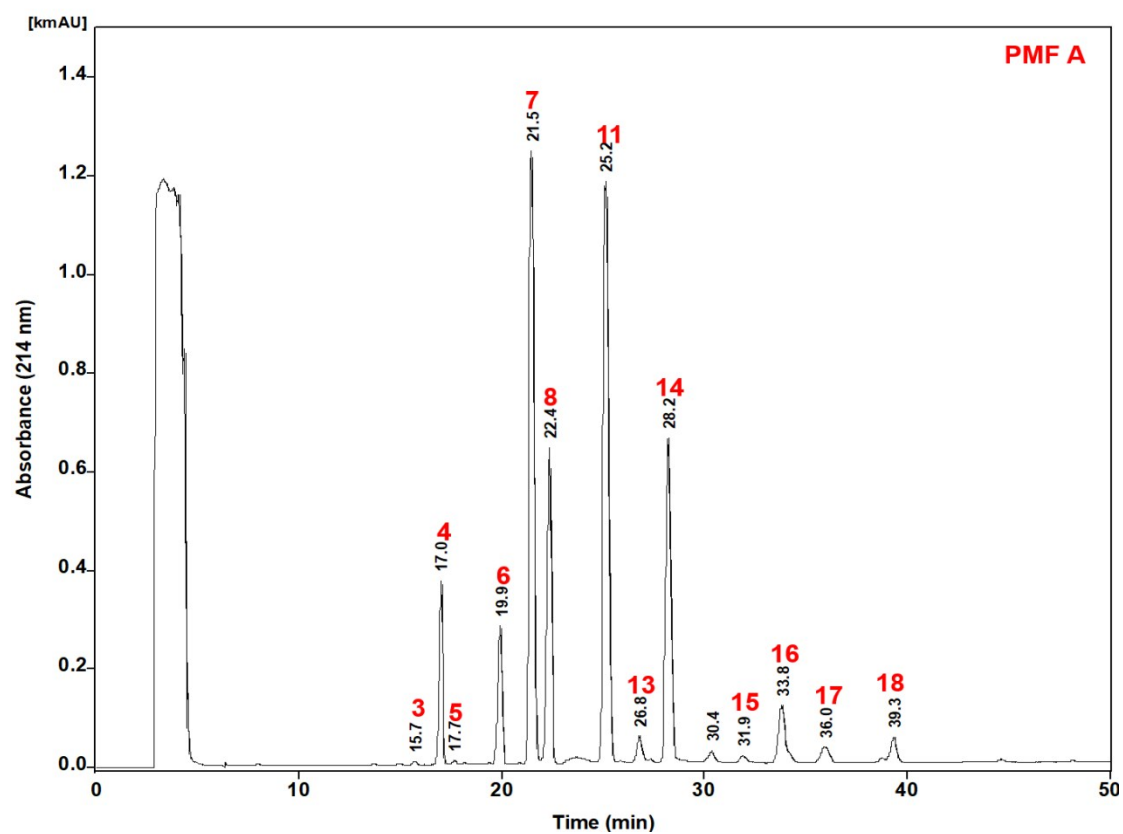

Supplementary Figure 3. HPLC profile of PMF B

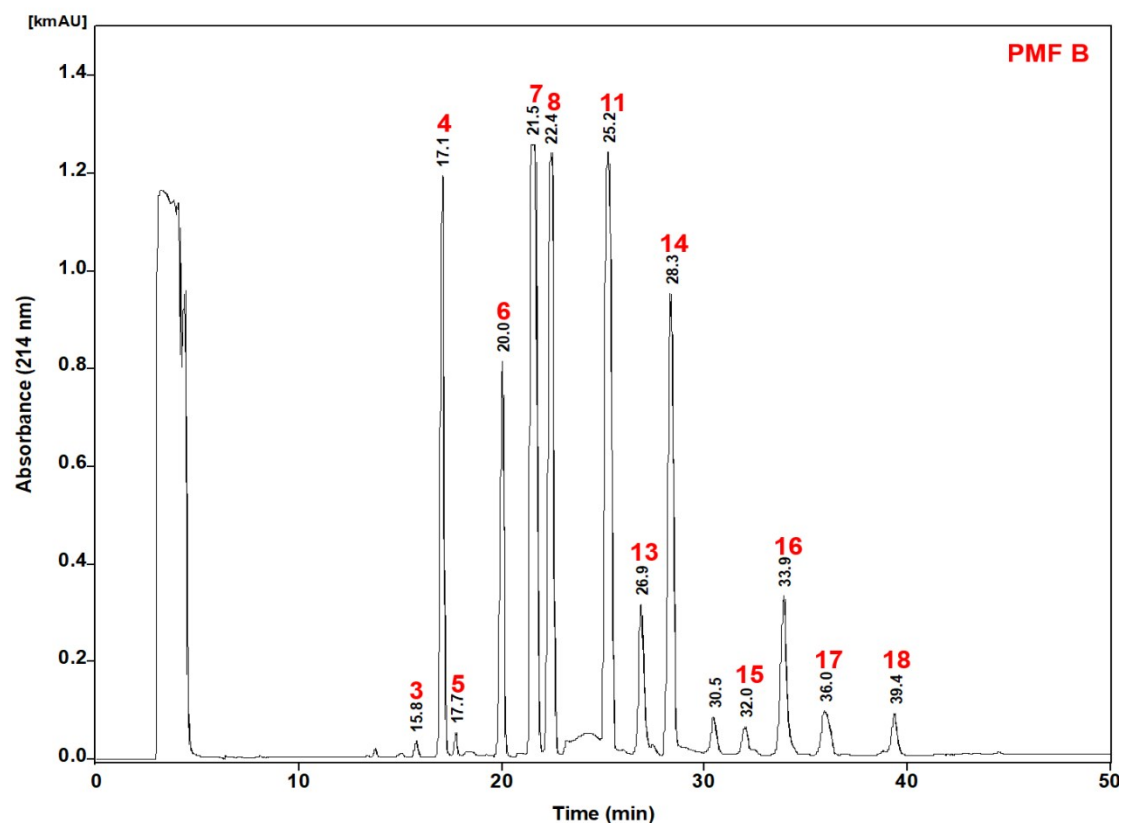

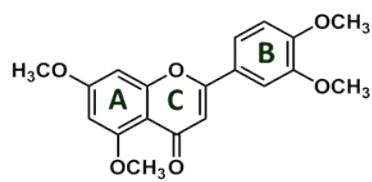

**4-PMF**  
5,7,3',4'-tetramethoxyflavone

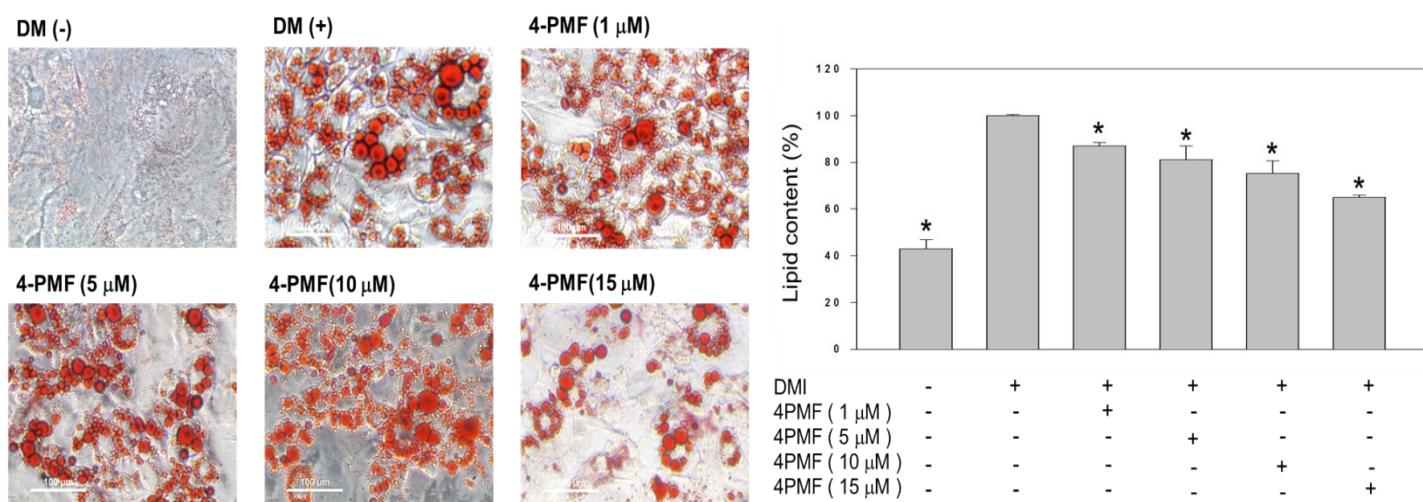

**Supplementary Figure 4. Effects of 4-PMF on 3T3-L1 preadipocyte model. DM (-), without differentiation medium; DM (+), with differentiation medium containing insulin, IBMX, DEX, and rosiglitazone. The cells were photographed under 200× magnification. Statistical evaluate was performed by Student's t test. Data are presented as the means ± SE for the indicated number of independently performed experiments. The differences between the DM(-), DM (+)and different concentrations of 4-PMF compounds were analysis by Student's t test. (\*)  $p < 0.05$ , statistically significant differences from DM (+) group.**
